# Supplementary material
Source: PubMed Central journal article supplement (PMC6646006)
Supplement: ao8b00403_si_001.pdf [file ao8b00403_si_001.pdf]

## Supporting Information

### **Identification of tobacco types and cigarette brands using an electronic nose based on conductive polymer/porphyrin composite sensors**

**C. Henrique A. Esteves<sup>a,§</sup>, Bernardo A. Iglesias<sup>a,d</sup>, Takuji Ogawa<sup>b</sup>, Koiti Araki<sup>a</sup>,  
Lucélia Hoehne<sup>c</sup>, Jonas Gruber<sup>a,\*</sup>**

<sup>a</sup> Departamento de Química Fundamental, Instituto de Química, Universidade de São Paulo, Avenida Professor Lineu Prestes, 748, 05508-000 São Paulo, SP, Brazil.

<sup>b</sup> Osaka University, Graduate School of Science, Department of Chemistry, Toyonaka, Osaka, 560 0043, Japan

<sup>c</sup> Centro Universitário UNIVATES, Av. Avelino Talini 171, 95900-000, Lajeado, RS, Brazil.

<sup>d</sup> Departamento de Química, Universidade Federal de Santa Maria, Avenida Roraima, 1000, 97105-900 Santa Maria, RS, Brazil.

\*Corresponding author. Tel.: +55 11 3091-1103

E-mail address: [jogruber@iq.usp.br](mailto:jogruber@iq.usp.br) (J. Gruber).

§ Current address:

Departamento de Farmácia, Faculdade de Ciências Farmacêuticas, Universidade de São Paulo, 05508-000 São Paulo, SP, Brazil.

## 1. Conductance output for cigarette brands

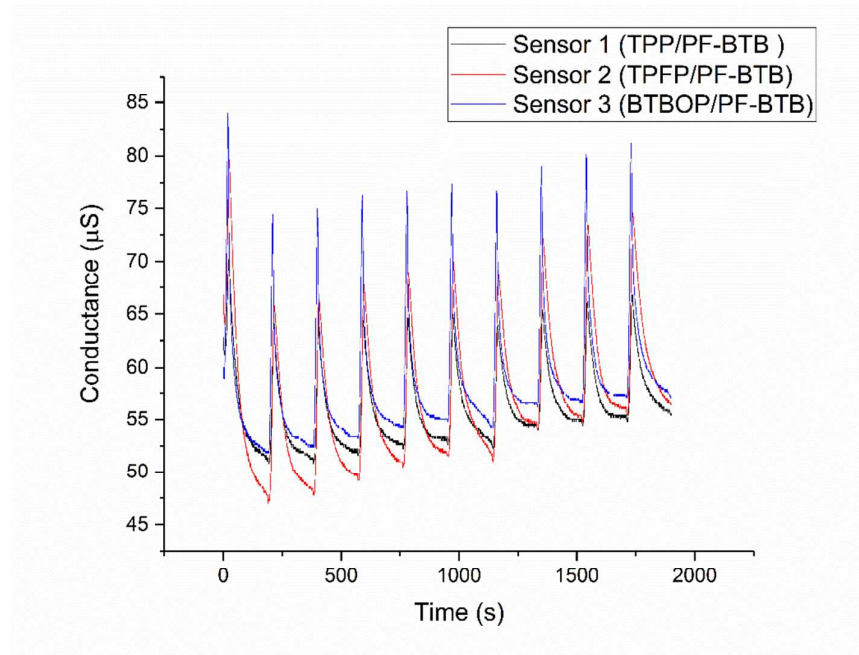

Figure S1: Conductance output for M1 (Marlboro Silver).

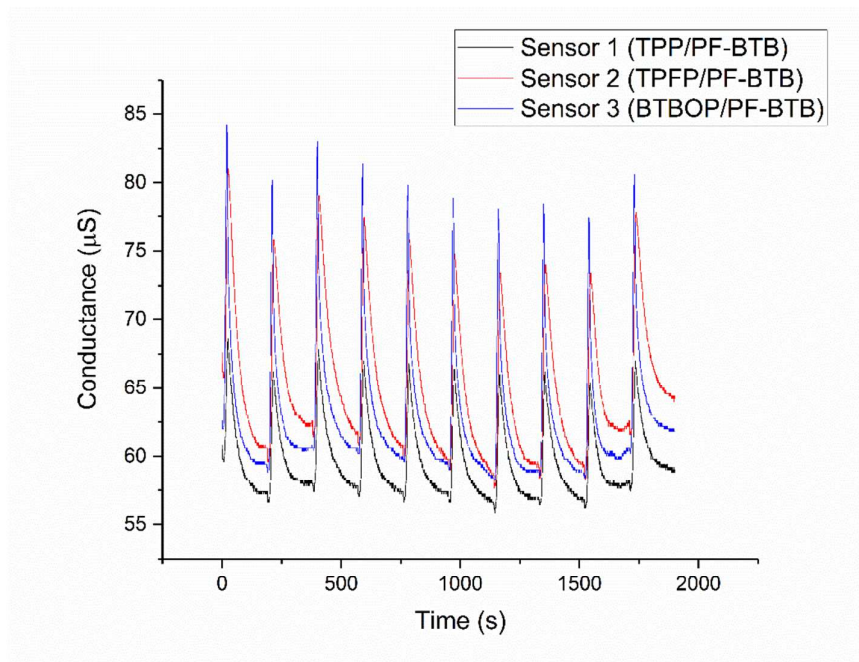

Figure S2: Conductance output for M2 (Marlboro Gold).

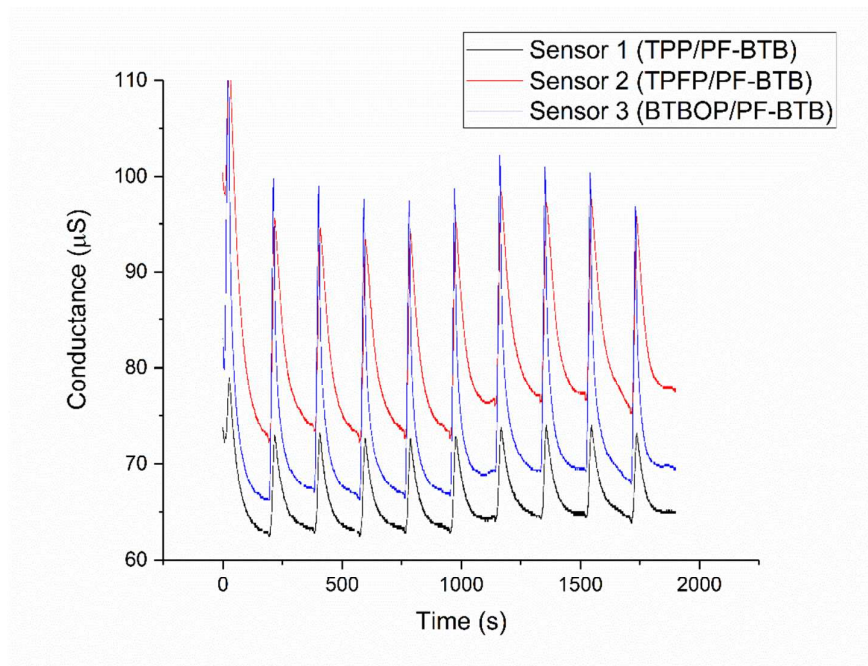

**Figure S3:** Conductance output for M3 (Marlboro).

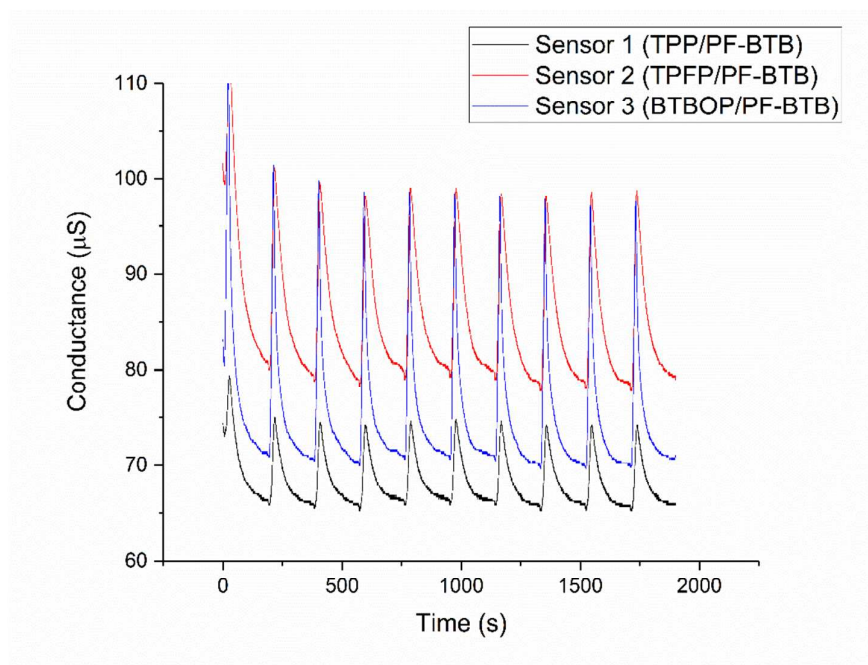

**Figure S4:** Conductance output for M4 (Marlboro Blue Ice).

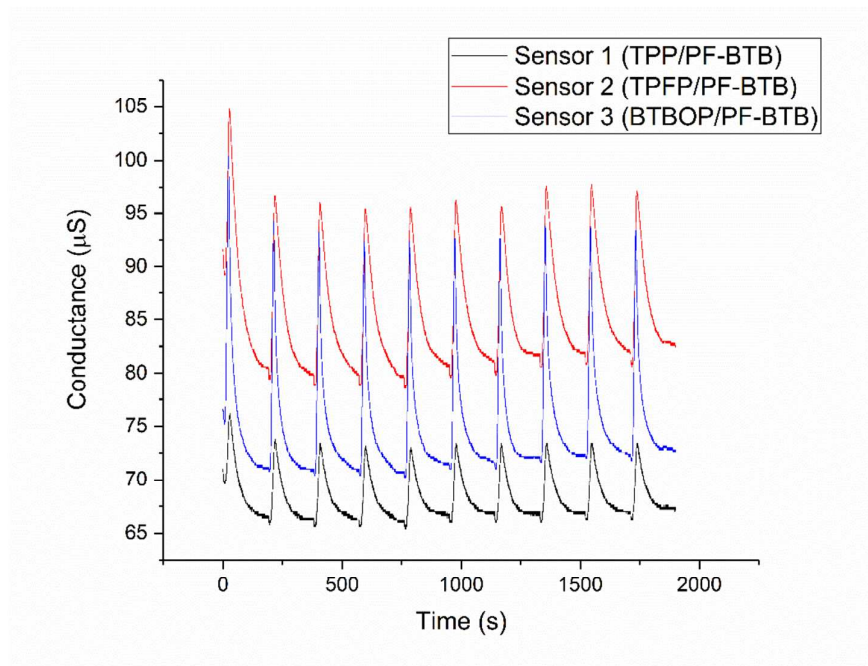

**Figure S5:** Conductance output for M5 (Marlboro Fresh Mint).

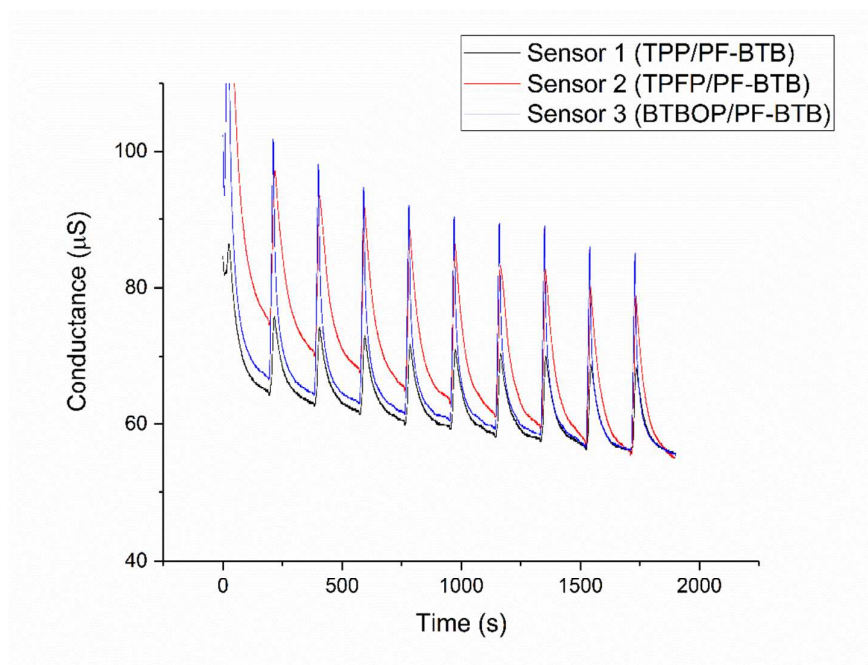

**Figure S6:** Conductance output for S1 (Dunhill).



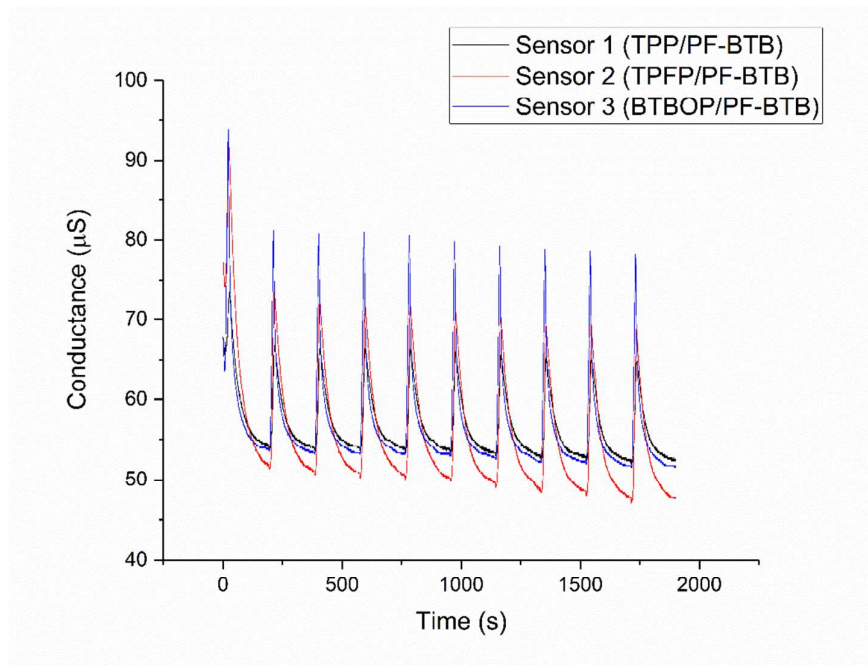

**Figure S7:** Conductance output for S2 (Lucky Strike).

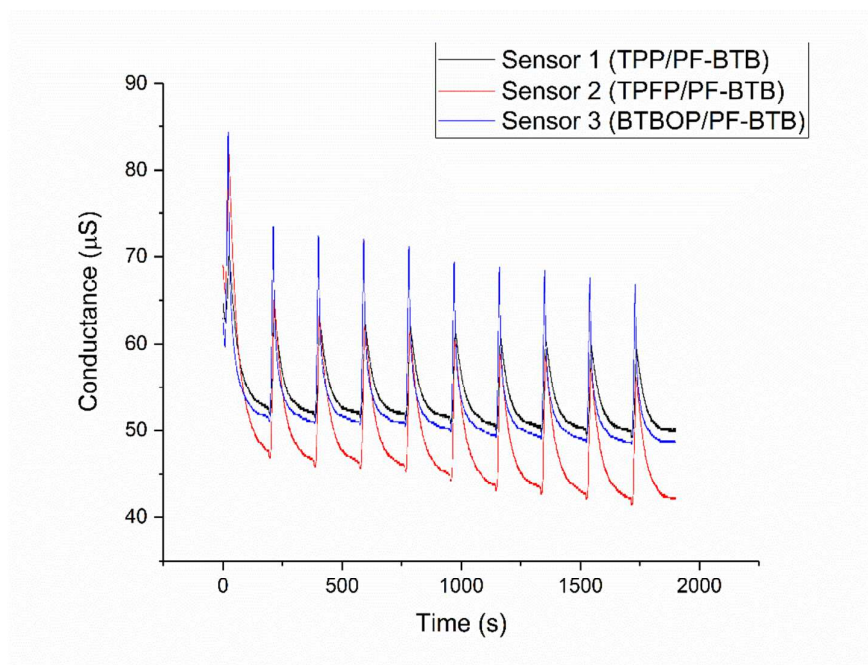

**Figure S8:** Conductance output for S3 (Derby).
